# Supplementary material for: The draft genome sequence of forest musk deer (Moschus berezovskii)
Source: PubMed Central journal article supplement (PMC5906906; doi:10.1093/gigascience/giy038), 2018-04-09
Supplement: giy038_giga-d-17-00185_revision_2.pdf [file giy038_giga-d-17-00185_revision_2.pdf]

|                                                      |                                                                                                                                                                                                                                                                                                                                                                                                                                                                                                                                                                                                                                                                                                                                                                                                                                                                                                                                                                                                                                                                                                                                                                                                                                                                                                                                                                                                                                                                                                                                                                                                                                                                                                                                                                                                                                                                                                                                                                                                                                                                                                      |                |
|------------------------------------------------------|------------------------------------------------------------------------------------------------------------------------------------------------------------------------------------------------------------------------------------------------------------------------------------------------------------------------------------------------------------------------------------------------------------------------------------------------------------------------------------------------------------------------------------------------------------------------------------------------------------------------------------------------------------------------------------------------------------------------------------------------------------------------------------------------------------------------------------------------------------------------------------------------------------------------------------------------------------------------------------------------------------------------------------------------------------------------------------------------------------------------------------------------------------------------------------------------------------------------------------------------------------------------------------------------------------------------------------------------------------------------------------------------------------------------------------------------------------------------------------------------------------------------------------------------------------------------------------------------------------------------------------------------------------------------------------------------------------------------------------------------------------------------------------------------------------------------------------------------------------------------------------------------------------------------------------------------------------------------------------------------------------------------------------------------------------------------------------------------------|----------------|
| <b>Manuscript Number:</b>                            | GIGA-D-17-00185R2                                                                                                                                                                                                                                                                                                                                                                                                                                                                                                                                                                                                                                                                                                                                                                                                                                                                                                                                                                                                                                                                                                                                                                                                                                                                                                                                                                                                                                                                                                                                                                                                                                                                                                                                                                                                                                                                                                                                                                                                                                                                                    |                |
| <b>Full Title:</b>                                   | The draft genome sequence of forest musk deer ( <i>Moschus berezovskii</i> )                                                                                                                                                                                                                                                                                                                                                                                                                                                                                                                                                                                                                                                                                                                                                                                                                                                                                                                                                                                                                                                                                                                                                                                                                                                                                                                                                                                                                                                                                                                                                                                                                                                                                                                                                                                                                                                                                                                                                                                                                         |                |
| <b>Article Type:</b>                                 | Data Note                                                                                                                                                                                                                                                                                                                                                                                                                                                                                                                                                                                                                                                                                                                                                                                                                                                                                                                                                                                                                                                                                                                                                                                                                                                                                                                                                                                                                                                                                                                                                                                                                                                                                                                                                                                                                                                                                                                                                                                                                                                                                            |                |
| <b>Funding Information:</b>                          | National Key Program of Research and Development, Ministry of Science and Technology (2016YFC0503200)                                                                                                                                                                                                                                                                                                                                                                                                                                                                                                                                                                                                                                                                                                                                                                                                                                                                                                                                                                                                                                                                                                                                                                                                                                                                                                                                                                                                                                                                                                                                                                                                                                                                                                                                                                                                                                                                                                                                                                                                | Dr. Bisong Yue |
|                                                      | National Natural Science Foundation of China (31702032)                                                                                                                                                                                                                                                                                                                                                                                                                                                                                                                                                                                                                                                                                                                                                                                                                                                                                                                                                                                                                                                                                                                                                                                                                                                                                                                                                                                                                                                                                                                                                                                                                                                                                                                                                                                                                                                                                                                                                                                                                                              | Dr. Wenhua Qi  |
| <b>Abstract:</b>                                     | <p><b>Background:</b> The forest musk deer, <i>Moschus berezovskii</i>, is one of seven musk deer (<i>Moschus</i> spp.) and is distributed in Southwest China. Akin to other musk deer, the forest musk deer has been traditionally, and is currently, hunted for its musk (i.e. global perfume industry). Considerable hunting pressure and habitat loss has caused significant population declines and therefore the Chinese government commenced captive breeding programs for musk harvesting in the 1950s. However, the prevalence of fatal diseases is considerably restricting population increases. Disease severity and extent is exacerbated by inbreeding and genetic diversity declines in captive musk deer populations. It is essential for the physical and genetic health of captive and wild forest musk deer populations to improve knowledge of its immune system and genome. We have thus sequenced the whole genome of the forest musk deer, completed the genomic assembly and annotation, and performed preliminary bioinformatic analyses.</p> <p><b>Findings:</b> A total of 407 Gb raw reads from whole-genome sequencing was generated by the Illumina HiSeq 4000 platform. The final assembly genome is around 2.72 Gb, with a contig N50 length of 22.6 kb and a scaffold N50 length 2.85 Mb. We identified 24,352 genes, and found 42.05% of the genome is composed of repetitive elements. We also detected 1,236 olfactory receptor genes. The genome-wide phylogenetic tree indicated that the forest musk deer was within the order Artiodactyla, and it appeared as the sister clade of four members of family Bovidae. In total, 576 genes were under positive selection in the forest musk deer lineage.</p> <p><b>Conclusions:</b> We provide the first genome sequence and gene annotation for the forest musk deer. The availability of these resources will be very useful for the conservation and captive breeding for this Endangered and economically important species, and for reconstructing the evolutionary history of the order Artiodactyla.</p> |                |
| <b>Corresponding Author:</b>                         | Zhenxin Fan, Ph.D.<br>Sichuan University<br>Chengdu, Sichuan CHINA                                                                                                                                                                                                                                                                                                                                                                                                                                                                                                                                                                                                                                                                                                                                                                                                                                                                                                                                                                                                                                                                                                                                                                                                                                                                                                                                                                                                                                                                                                                                                                                                                                                                                                                                                                                                                                                                                                                                                                                                                                   |                |
| <b>Corresponding Author Secondary Information:</b>   |                                                                                                                                                                                                                                                                                                                                                                                                                                                                                                                                                                                                                                                                                                                                                                                                                                                                                                                                                                                                                                                                                                                                                                                                                                                                                                                                                                                                                                                                                                                                                                                                                                                                                                                                                                                                                                                                                                                                                                                                                                                                                                      |                |
| <b>Corresponding Author's Institution:</b>           | Sichuan University                                                                                                                                                                                                                                                                                                                                                                                                                                                                                                                                                                                                                                                                                                                                                                                                                                                                                                                                                                                                                                                                                                                                                                                                                                                                                                                                                                                                                                                                                                                                                                                                                                                                                                                                                                                                                                                                                                                                                                                                                                                                                   |                |
| <b>Corresponding Author's Secondary Institution:</b> |                                                                                                                                                                                                                                                                                                                                                                                                                                                                                                                                                                                                                                                                                                                                                                                                                                                                                                                                                                                                                                                                                                                                                                                                                                                                                                                                                                                                                                                                                                                                                                                                                                                                                                                                                                                                                                                                                                                                                                                                                                                                                                      |                |
| <b>First Author:</b>                                 | Zhenxin Fan, Ph.D.                                                                                                                                                                                                                                                                                                                                                                                                                                                                                                                                                                                                                                                                                                                                                                                                                                                                                                                                                                                                                                                                                                                                                                                                                                                                                                                                                                                                                                                                                                                                                                                                                                                                                                                                                                                                                                                                                                                                                                                                                                                                                   |                |
| <b>First Author Secondary Information:</b>           |                                                                                                                                                                                                                                                                                                                                                                                                                                                                                                                                                                                                                                                                                                                                                                                                                                                                                                                                                                                                                                                                                                                                                                                                                                                                                                                                                                                                                                                                                                                                                                                                                                                                                                                                                                                                                                                                                                                                                                                                                                                                                                      |                |
| <b>Order of Authors:</b>                             | Zhenxin Fan, Ph.D.                                                                                                                                                                                                                                                                                                                                                                                                                                                                                                                                                                                                                                                                                                                                                                                                                                                                                                                                                                                                                                                                                                                                                                                                                                                                                                                                                                                                                                                                                                                                                                                                                                                                                                                                                                                                                                                                                                                                                                                                                                                                                   |                |
|                                                      | Bisong Yue                                                                                                                                                                                                                                                                                                                                                                                                                                                                                                                                                                                                                                                                                                                                                                                                                                                                                                                                                                                                                                                                                                                                                                                                                                                                                                                                                                                                                                                                                                                                                                                                                                                                                                                                                                                                                                                                                                                                                                                                                                                                                           |                |
|                                                      | Wujiao Li                                                                                                                                                                                                                                                                                                                                                                                                                                                                                                                                                                                                                                                                                                                                                                                                                                                                                                                                                                                                                                                                                                                                                                                                                                                                                                                                                                                                                                                                                                                                                                                                                                                                                                                                                                                                                                                                                                                                                                                                                                                                                            |                |
|                                                      | Chaochao Yan                                                                                                                                                                                                                                                                                                                                                                                                                                                                                                                                                                                                                                                                                                                                                                                                                                                                                                                                                                                                                                                                                                                                                                                                                                                                                                                                                                                                                                                                                                                                                                                                                                                                                                                                                                                                                                                                                                                                                                                                                                                                                         |                |
|                                                      | Jing Li                                                                                                                                                                                                                                                                                                                                                                                                                                                                                                                                                                                                                                                                                                                                                                                                                                                                                                                                                                                                                                                                                                                                                                                                                                                                                                                                                                                                                                                                                                                                                                                                                                                                                                                                                                                                                                                                                                                                                                                                                                                                                              |                |

|                                                |                                                                                                                                                                                                                                                                                                                                                                                                                                                                                                                                                                                                                                                                                                                                                                                                                                                                                                                                                                                                                                                                                                                                                                                                                                                                                                                                                                                                                                                                                                                                                                                                                                                                                                                                                                                                                                                                                                                                                                                                                                                                                                                                                                                                                                                                                                                                                                                                                                                                                                                                                                                                                                                                                                                                                                                                                                                                                                                                                                                                                                                                                                                                                                                                                                                                                                                                                                                                                                                                                       |
|------------------------------------------------|---------------------------------------------------------------------------------------------------------------------------------------------------------------------------------------------------------------------------------------------------------------------------------------------------------------------------------------------------------------------------------------------------------------------------------------------------------------------------------------------------------------------------------------------------------------------------------------------------------------------------------------------------------------------------------------------------------------------------------------------------------------------------------------------------------------------------------------------------------------------------------------------------------------------------------------------------------------------------------------------------------------------------------------------------------------------------------------------------------------------------------------------------------------------------------------------------------------------------------------------------------------------------------------------------------------------------------------------------------------------------------------------------------------------------------------------------------------------------------------------------------------------------------------------------------------------------------------------------------------------------------------------------------------------------------------------------------------------------------------------------------------------------------------------------------------------------------------------------------------------------------------------------------------------------------------------------------------------------------------------------------------------------------------------------------------------------------------------------------------------------------------------------------------------------------------------------------------------------------------------------------------------------------------------------------------------------------------------------------------------------------------------------------------------------------------------------------------------------------------------------------------------------------------------------------------------------------------------------------------------------------------------------------------------------------------------------------------------------------------------------------------------------------------------------------------------------------------------------------------------------------------------------------------------------------------------------------------------------------------------------------------------------------------------------------------------------------------------------------------------------------------------------------------------------------------------------------------------------------------------------------------------------------------------------------------------------------------------------------------------------------------------------------------------------------------------------------------------------------------|
|                                                | Yongmei Shen                                                                                                                                                                                                                                                                                                                                                                                                                                                                                                                                                                                                                                                                                                                                                                                                                                                                                                                                                                                                                                                                                                                                                                                                                                                                                                                                                                                                                                                                                                                                                                                                                                                                                                                                                                                                                                                                                                                                                                                                                                                                                                                                                                                                                                                                                                                                                                                                                                                                                                                                                                                                                                                                                                                                                                                                                                                                                                                                                                                                                                                                                                                                                                                                                                                                                                                                                                                                                                                                          |
|                                                | Wenhua Qi                                                                                                                                                                                                                                                                                                                                                                                                                                                                                                                                                                                                                                                                                                                                                                                                                                                                                                                                                                                                                                                                                                                                                                                                                                                                                                                                                                                                                                                                                                                                                                                                                                                                                                                                                                                                                                                                                                                                                                                                                                                                                                                                                                                                                                                                                                                                                                                                                                                                                                                                                                                                                                                                                                                                                                                                                                                                                                                                                                                                                                                                                                                                                                                                                                                                                                                                                                                                                                                                             |
| <b>Order of Authors Secondary Information:</b> |                                                                                                                                                                                                                                                                                                                                                                                                                                                                                                                                                                                                                                                                                                                                                                                                                                                                                                                                                                                                                                                                                                                                                                                                                                                                                                                                                                                                                                                                                                                                                                                                                                                                                                                                                                                                                                                                                                                                                                                                                                                                                                                                                                                                                                                                                                                                                                                                                                                                                                                                                                                                                                                                                                                                                                                                                                                                                                                                                                                                                                                                                                                                                                                                                                                                                                                                                                                                                                                                                       |
| <b>Response to Reviewers:</b>                  | <p>Reviewer #1</p> <p>The paper by Fan et al. reports the genome assembly of the forest musk deer (<i>Moschus berezovskii</i>). The species is globally threatened and listed under CITES Appendix II, yet a relatively robust commercial farming (for musk) industry exists in China. Genomic resources will likely be informative for management, notably breeding programs and limiting disease transmission (Sun et al. 2018 Sci. Rep).</p> <p>1. This is my second time reviewing the article and as noted previously, the genome assembly reflects the industry standard. The paper needs to be edited for spelling and grammar and I have listed some minor points below.<br/>Response: We carefully checked the whole main text, supplementary notes and tables to improve the language.</p> <p>2. Can the authors explain why they chose a male for the genome assembly? The homogametic sex is often selected for assembly in an effort to generate high enough coverage for the assembly of one of the sex chromosomes. If there is a reason, including oversight, I think this should be noted for subsequent groups interested in assembling non-model genomes.<br/>Response: Only the male individuals can secrete the musk. One of the major aims for this genomic project is going to provide whole genome sequence to investigate potential pathway/regulation of musk secretion. Therefore, we chose to sequence and assemble a male individual.</p> <p>3. L84-86: Awkward wording<br/>Response: We have re-written the word as “In the last two centuries, hunting of all musk deer species significantly increased because of the commercially valuable of musk, which was an essential basis for perfume manufacture”.</p> <p>4. L89: hyphen unnecessary<br/>Response: Thanks, we deleted the hyphen.</p> <p>5. L100-102: Please provide a reference supporting disease severity being exacerbated by inbreeding and lack of genetic diversity.<br/>Response: We added two references.<br/>1. Zhao K, Liu Y, Zhang X, et al. Detection and characterization of antibiotic-resistance genes in <i>Arcanobacterium pyogenes</i> strains from abscesses of forest musk deer. <i>J Med Microbiol.</i> 2011;60:1820-6.<br/>2. Huang J, Li Y, Li P, et al. Genetic quality of the Miyaluo captive forest musk deer (<i>Moschus berezovskii</i>) population as assessed by microsatellite loci. <i>Biochemical Systematics &amp; Ecology</i>, 2013;47(8):25-30.</p> <p>6. L103: Please clarify what genetic health means<br/>Response: We mean the genomic information could be useful for the genetic management and disease prevention of the captive forest musk deer. To avoid misunderstanding, we have re-written the sentence.</p> <p>7. L107-108: Needs revision<br/>Response: Thanks, it was a mistake, we already removed selection and gene enrichments based on editor and reviewers' last comments. We have re-written this sentence.</p> <p>8. L137: Is there a citation for the transcriptome data? Sun et al. generated transcriptomic data, and their analysis / story are relevant to this manuscript.<br/>Response: The transcriptome data were used to evaluate the assembly and help the annotation. These data were uploaded to NCBI by Sichuan Agricultural University on July 2015. We did not find related publication. However, I contacted the author (submitter), and they said the paper had been published on Dec. 2017. They did not</p> |

use the SSR numbers within the paper, thus we could not find it. Now, we cited their publication (Xu et al., 2017; Line 104 of the main text). The new paper (Sun et al., 2018) was published on January 2018 by other Chinese group. Therefore, we could not use their new data. However, we cited Sun et al.'s paper at the Introduction Section.

9. L139-L141. Delete - let the reader decided, based on the statistics provided, if this is a high quality genome

Response: We deleted this sentence.

10. L178. WEGO is not defined.

Response: We added the explanation. It is Web Gene Ontology Annotation Plot.

11. L182. Avoid the use of and/or; or will suffice 99% of the time.

Response: Thanks, we only keep the "or" in the sentence.

12. L189. That is your entire list of TEs, so "such as" is not required.

Response: We replaced "such as " as "including".

13. L233. "China's ecology" should be written differently.

Response: Thanks, it was a mistake, we have re-written the words as "Chinese ecology".

14. L236: (E)ndangered - should be lower case.

Response: Thanks, we have re-written the word.

Reviewer #2

The authors addressed most of my concerns. The editors provided the link to the Gigascience repository with the data.

Remaining comments:

1. Unanswered question: the EVM usage is not specified, nor is it mentioned in the Sup Notes. As this merging step was the one that generated the final annotation, according to the source field of the gff file, it would be useful to describe it.

Response: We added the information for EVM in Supplementary Notes: "Finally, EVM was used to interpret all the above evidences, and the key parameters were as following: segmentSize = 1Mb, overlapSize = 20kb. The weight for de novo, homology and transcriptome-based gene predictions in EVM were set to 1, 5, and 10 respectively."

2. Sequencing and filtering: was cutadapt used with the same parameters for regular PE and mate-pair libraries? I am not sure it should be. Please precise. Was NGSQCToolkit used after cutadapt? Isn't there some redundancy with its adapter trimming step?

Response: NGSQCToolkit could not remove the adapters. The sequencing company (Novogene, China) had all the libraries based on the manufacturer's protocol, thus Novogene had the adaptor information. They removed the adaptors and duplicate reads, then we ran NGSQCToolkit to further control the data quality. We added this explanation within the Supplementary Notes (section one).

3. 117: "A total of 407Gb of raw data were generated, after filtering out low quality, duplicate and adaptor polluted reads. Approximately 360Gb of high-quality reads were retained for genome assembly (Table 1)."

|                                                                                                                                                                                                                                                                                                                                                                                                                                                                                                             |                                                                                                                                                                                                                                                                                                                                                                                                                                                                                                                                                                                                                                                                                                                                                                                                                                                               |
|-------------------------------------------------------------------------------------------------------------------------------------------------------------------------------------------------------------------------------------------------------------------------------------------------------------------------------------------------------------------------------------------------------------------------------------------------------------------------------------------------------------|---------------------------------------------------------------------------------------------------------------------------------------------------------------------------------------------------------------------------------------------------------------------------------------------------------------------------------------------------------------------------------------------------------------------------------------------------------------------------------------------------------------------------------------------------------------------------------------------------------------------------------------------------------------------------------------------------------------------------------------------------------------------------------------------------------------------------------------------------------------|
|                                                                                                                                                                                                                                                                                                                                                                                                                                                                                                             | <p>407Gb *after* filtering? Why 360Gb then?<br/> Response: Sorry, our sentences were not clean. The raw data is about 407 Gb, and the clean data is about 360 Gb. We have re-written the sentences. Now, it is: "A total of 407Gb of raw data were generated. After filtering out low quality, duplicates and adaptor polluted reads, about 360Gb of high-quality reads were retained for genome assembly".</p> <p>4. The Supplementary Notes should be improved and proofread. Examples:<br/> p.1: "sequencing data quality control was guide by ", "he re", "base- calling"<br/> p.2: "were mapping to musk deer genome"<br/> p.3: "were then aligned" ... "The script require"... "will concatenate" ... "It finally produces" (check the tense)<br/> Response: We carefully checked the whole supplementary notes and tables to improve the language.</p> |
| <b>Additional Information:</b>                                                                                                                                                                                                                                                                                                                                                                                                                                                                              |                                                                                                                                                                                                                                                                                                                                                                                                                                                                                                                                                                                                                                                                                                                                                                                                                                                               |
| <b>Question</b>                                                                                                                                                                                                                                                                                                                                                                                                                                                                                             | <b>Response</b>                                                                                                                                                                                                                                                                                                                                                                                                                                                                                                                                                                                                                                                                                                                                                                                                                                               |
| Are you submitting this manuscript to a special series or article collection?                                                                                                                                                                                                                                                                                                                                                                                                                               | No                                                                                                                                                                                                                                                                                                                                                                                                                                                                                                                                                                                                                                                                                                                                                                                                                                                            |
| <b>Experimental design and statistics</b>                                                                                                                                                                                                                                                                                                                                                                                                                                                                   | Yes                                                                                                                                                                                                                                                                                                                                                                                                                                                                                                                                                                                                                                                                                                                                                                                                                                                           |
| <p>Full details of the experimental design and statistical methods used should be given in the Methods section, as detailed in our <a href="#">Minimum Standards Reporting Checklist</a>. Information essential to interpreting the data presented should be made available in the figure legends.</p> <p>Have you included all the information requested in your manuscript?</p>                                                                                                                           |                                                                                                                                                                                                                                                                                                                                                                                                                                                                                                                                                                                                                                                                                                                                                                                                                                                               |
| <b>Resources</b>                                                                                                                                                                                                                                                                                                                                                                                                                                                                                            | Yes                                                                                                                                                                                                                                                                                                                                                                                                                                                                                                                                                                                                                                                                                                                                                                                                                                                           |
| <p>A description of all resources used, including antibodies, cell lines, animals and software tools, with enough information to allow them to be uniquely identified, should be included in the Methods section. Authors are strongly encouraged to cite <a href="#">Research Resource Identifiers</a> (RRIDs) for antibodies, model organisms and tools, where possible.</p> <p>Have you included the information requested as detailed in our <a href="#">Minimum Standards Reporting Checklist</a>?</p> |                                                                                                                                                                                                                                                                                                                                                                                                                                                                                                                                                                                                                                                                                                                                                                                                                                                               |
| <b>Availability of data and materials</b>                                                                                                                                                                                                                                                                                                                                                                                                                                                                   | Yes                                                                                                                                                                                                                                                                                                                                                                                                                                                                                                                                                                                                                                                                                                                                                                                                                                                           |
| <p>All datasets and code on which the conclusions of the paper rely must be either included in your submission or deposited in <a href="#">publicly available repositories</a> (where available and ethically</p>                                                                                                                                                                                                                                                                                           |                                                                                                                                                                                                                                                                                                                                                                                                                                                                                                                                                                                                                                                                                                                                                                                                                                                               |

appropriate), referencing such data using a unique identifier in the references and in the “Availability of Data and Materials” section of your manuscript.

Have you have met the above requirement as detailed in our [Minimum Standards Reporting Checklist?](#)

1 **The draft genome sequence of forest musk deer (*Moschus berezovskii*)**

2  
3  
4  
5  
6  
7  
8

9 Zhenxin Fan<sup>1,†</sup>, Wujiao Li<sup>1,†</sup>, Jiazheng Jin<sup>1</sup>, Kai Cui<sup>1</sup>, Chaochao Yan<sup>1</sup>, Changjun

10 Peng<sup>1</sup>, Zuoyi Jian<sup>1</sup>, Ping Bu<sup>1</sup>, Megan Price<sup>1</sup>, Xiuyue Zhang<sup>1</sup>, Yongmei Shen<sup>3</sup>, Jing

11 Li<sup>1</sup>, Wenhua Qi<sup>2,\*</sup>, Bisong Yue<sup>1,\*</sup>

12  
13  
14  
15  
16

17 <sup>1</sup>Key Laboratory of Bioresources and Ecoenvironment (Ministry of Education),

18 College of Life Sciences, Sichuan University, Chengdu 610064, People's Republic

19 of China

20 <sup>2</sup>College of Life Science and Engineering, Chongqing Three Gorges University,

21 Chongqing 404100, People's Republic of China

22 <sup>3</sup>Sichuan Engineering Research Center for Medicinal Animals, Xichang 615000,

23 People's Republic of China

24 † Contributed equally to this work

25 \* **Corresponding author:** Bisong Yue (bsyue@scu.edu.cn), and Wenhua Qi

26 (wenhuaqi357@163.com)

27 **Emails:** zxfan@scu.edu.cn (Zhenxin Fan); hnnd059@gmail.com (Wujiao Li);

28 wenhuaqi357@163.com (Wenhua Qi); jinjiazhengxiao@163.com (Jiazheng Jin);

29 2015222040118@stu.scu.edu.cn (Kai Cui); yccvican@gmail.com (Chaochao Yan);

30 jj-5380682@163.com (Changjun Peng); jzuoyi@126.com (Zuoyi Jian);

31 757984931@qq.com (Ping Bu); meganprice@scu.edu.cn (Megan Price);

32 zhangxy317@126.com (Xiuyue Zhang); Yongmei Shen (810316122@qq.com);

33 Jing Li (ljtjf@126.com); bsyue@scu.edu.cn (Bisong Yue)

1  
2  
3  
4  
5  
6  
7  
8  
9  
10  
11  
12  
13  
14  
15  
16  
17  
18  
19  
20  
21  
22  
23  
24  
25  
26  
27  
28  
29  
30  
31  
32  
33  
34  
35  
36  
37  
38  
39  
40  
41  
42  
43  
44  
45  
46  
47  
48  
49  
50  
51  
52  
53  
54  
55  
56  
57  
58  
59  
60  
61  
62  
63  
64  
65

## 24 Abstract

25 **Background:** The forest musk deer, *Moschus berezovskii*, is one of seven musk  
26 deer (*Moschus* spp.) and is distributed in Southwest China. Akin to other musk  
27 deer, the forest musk deer has been traditionally, and is currently, hunted for its  
28 musk (i.e. global perfume industry). Considerable hunting pressure and habitat  
29 loss has caused significant population declines and therefore the Chinese  
30 government commenced captive breeding programs for musk harvesting in the  
31 1950s. However, the prevalence of fatal diseases is considerably restricting  
32 population increases. Disease severity and extent is exacerbated by inbreeding  
33 and genetic diversity declines in captive musk deer populations. It is essential for  
34 the physical and genetic health of captive and wild forest musk deer populations  
35 to improve the knowledge of its immune system and genome. We have thus  
36 sequenced the whole genome of the forest musk deer, completed the genomic  
37 assembly and annotation, and performed preliminary bioinformatic analyses.

38 **Findings:** A total of 407 Gb raw reads from whole-genome sequencing was  
39 generated by the Illumina HiSeq 4000 platform. The final genome assembly is  
40 around 2.72 Gb, with a contig N50 length of 22.6 kb and a scaffold N50 length of  
41 2.85 Mb. We identified 24,352 genes, and found 42.05% of the genome is  
42 composed of repetitive elements. We also detected 1,236 olfactory receptor  
43 genes. The genome-wide phylogenetic tree indicated that the forest musk deer  
44 was within the order Artiodactyla, and it appeared as the sister clade of four  
45 members of Bovidae. In total, 576 genes were under positive selection in the  
46 forest musk deer lineage.

1  
2  
3  
4  
5  
6  
7  
8  
9  
10  
11  
12  
13  
14  
15  
16  
17  
18  
19  
20  
21  
22  
23  
24  
25  
26  
27  
28  
29  
30  
31  
32  
33  
34  
35  
36  
37  
38  
39  
40  
41  
42  
43  
44  
45  
46  
47  
48  
49  
50  
51  
52  
53  
54  
55  
56  
57  
58  
59  
60  
61  
62  
63  
64  
65

47 **Conclusions:** We provide the first genome sequence and gene annotation for the  
48 forest musk deer. The availability of these resources will be very useful for the  
49 conservation and captive breeding for this endangered and economically  
50 important species, and for reconstructing the evolutionary history of the order  
51 Artiodactyla.

52

53 **Keywords:** Forest musk deer; whole genome sequencing; genome assembly;  
54 annotation; phylogeny

55

56

57

58

59

60

61

62

63

64

65

66

67



1  
2  
3  
4  
5  
6  
7  
8  
9  
10  
11  
12  
13  
14  
15  
16  
17  
18  
19  
20  
21  
22  
23  
24  
25  
26  
27  
28  
29  
30  
31  
32  
33  
34  
35  
36  
37  
38  
39  
40  
41  
42  
43  
44  
45  
46  
47  
48  
49  
50  
51  
52  
53  
54  
55  
56  
57  
58  
59  
60  
61  
62  
63  
64  
65

68 **Data Description**

69 1) Background

70 The seven musk deer species of the genus *Moschus* are endemic to Asia. They are  
71 currently listed under Appendix II in CITES and under Category I of the State Key  
72 Protected Wildlife List of China [1-3]. All musk deer species are considered as  
73 globally threatened, with six being listed as endangered and one as vulnerable by  
74 the IUCN [4]. *Moschus* is the only extant genus of Moschidae and musk deer are  
75 considered as primitive deer. The genus of musk deer is characterized by the  
76 musk secreted by the scent glands of adult males [5]. The forest musk deer  
77 (*Moschus berezovskii*) is one of the five recognized musk deer species of China  
78 and have historically been distributed in Southwest China [6,7]. The forest musk  
79 deer has been listed as globally endangered, as Critically Endangered on the  
80 2015 China Red List, and is also on the State Key Protected Wildlife List of China  
81 [4].

82 Musk deer have been hunted for thousands of years, as the musk has been  
83 widely used in traditional Chinese medicines. In the last two centuries, hunting  
84 of all musk deer species significantly increased because of the commercial value  
85 of musk, which was an essential basis for perfume manufacture [5]. Since the  
86 1950s, populations of forest musk deer have declined dramatically from  
87 poaching of deer for the musk pods (i.e. entire gland) and significant habitat  
88 destruction [3,6,8]. As a consequence, the Chinese government has encouraged  
89 musk using enterprises to participate in artificial breeding programs since the  
90 early 1950s [9]. The musk can be collected from male musk deer in these captive

1  
2  
3  
4  
5  
6  
7  
8  
9  
10  
11  
12  
13  
14  
15  
16  
17  
18  
19  
20  
21  
22  
23  
24  
25  
26  
27  
28  
29  
30  
31  
32  
33  
34  
35  
36  
37  
38  
39  
40  
41  
42  
43  
44  
45  
46  
47  
48  
49  
50  
51  
52  
53  
54  
55  
56  
57  
58  
59  
60  
61  
62  
63  
64  
65

91 populations without harvesting individuals, further enhancing the commercial  
92 and conservation value of captive populations.

93         The captive population of the forest musk deer is the largest among all  
94 the musk deer species [2,10]. The Miyaluo farming population in Sichuan  
95 Province (China) was one of the earliest established captive breeding  
96 populations. This population had grown rapidly to approximately 400 in 2010  
97 [10]. However, the prevalence of fatal diseases is considerably restricting  
98 population increases [11]. Common diseases of forest musk deer in the Miyaluo  
99 population are dyspepsia, pneumonia, metritis, urinary stones and abscesses,  
100 with abscesses being one of the most prevalent causes of death [7]. Disease  
101 severity and extent is exacerbated by inbreeding and genetic diversity declines  
102 in this and other captive musk deer populations [7,10].

103         Although the transcriptomes of captive forest musk deer had been  
104 reported [12,13], there is no complete genome sequence, which is essential for  
105 the genetic management and disease prevention of captive and wild forest musk  
106 deer populations to improve knowledge of its immune system. We have thus  
107 sequenced the whole genome of the forest musk deer, subsequently completed  
108 the genomic assembly and annotation, and performed preliminary bioinformatic  
109 analyses, such as phylogenetic tree.

110

## 111 2) Sample information and sequencing

112 The thigh muscle sample was collected from a Miyaluo male forest musk deer  
113 that naturally died (Sichuan Province, China) in 2015. We extracted genomic  
114 DNA from the muscle sample using the Qiagen DNeasy Blood and Tissue Kit

115 (Qiagen, Valencia, USA) following the manufacturer's protocol. We constructed  
116 six different insert size libraries: 230bp, 500bp, 2kb, 5kb, 10kb, and 15kb. These  
117 libraries were sequenced by Illumina HiSeq 4000 platform at Novogene (Beijing,  
118 China). A total of 407Gb of raw data were generated. After filtering out low quality,  
119 duplicates and adaptors, about 360Gb of high-quality reads were retained for genome  
120 assembly (Table 1).

### 122 3) Genome assembly and evaluation

123 We use GCE (version 1.0) to performed k-mer (17-mer) analysis by short insert  
124 size library reads before assembly, and the forest musk deer genome size was  
125 estimated to be 2.95Gb (Figure S1). The assembly was first generated by  
126 SOAPdenovo2 (SOAPdenovo2, RRID:SCR\_014986) [14] with the parameters set  
127 as "all -d 2 -M 2 -k 35". Intra-scaffold gaps were filled using Gapcloser (version  
128 1.12) with reads from 230bp and 500bp libraries, and then SSPACE version 3.0  
129 (SSPACE, RRID:SCR\_005056) [15] was used to build super-scaffolds. After  
130 scaffolding by SSPACE, we used Gapcloser again to fill gaps. Finally we obtained  
131 the forest musk deer genome with a size of 2.72Gb (all the sequences with length  
132 shorter than 300bp were removed) with 125.7Mb gap sequences unsolved. The  
133 N50s of contigs and scaffolds of forest musk deer genome were 22.6kb and  
134 2.85Mb, respectively (Table 2).

135 We used BUSCO version 3.0 (BUSCO, RRID:SCR\_015008) to evaluate the  
136 genome complement. BUSCO results showed that 84.5% of the eukaryotic single-  
137 copy genes were captured (Table S1). Furthermore, we downloaded musk gland  
138 RNA-seq data (SRA accession: SRR2098995 and SRR2098996) of forest musk

1  
2  
3  
4  
5  
6  
7  
8  
9  
10  
11  
12  
13  
14  
15  
16  
17  
18  
19  
20  
21  
22  
23  
24  
25  
26  
27  
28  
29  
30  
31  
32  
33  
34  
35  
36  
37  
38  
39  
40  
41  
42  
43  
44  
45  
46  
47  
48  
49  
50  
51  
52  
53  
54  
55  
56  
57  
58  
59  
60  
61  
62  
63  
64  
65

139 deer from NCBI to evaluate the assembly [13]. We found that 99.3% of the total  
140 PE reads could be aligned (92.73% aligned concordantly) to the assembled  
141 forest musk deer genome by Bowtie2 (version 2.2.5) [16].

142

#### 143 4) Annotation

144 We combined the *de novo*, homology-based and transcriptome-based prediction  
145 to identify protein-coding genes in the forest musk deer genome. The software  
146 Augustus version 3.2.1 (Augustus: Gene Prediction, RRID:SCR\_008417) [17] was  
147 used for *de novo* prediction based on the parameter trained for forest musk deer.  
148 For homology prediction, protein sequences from four mammals (human, pig,  
149 sheep and cattle) were analyzed with TBLASTN (BLAST version 2.2.26) against  
150 forest musk deer genome. Potential gene regions were joined by SOLAR (version  
151 0.9.6) [18], and the coding sequence with 500bp flanking sequence were cut  
152 down and re-aligned by GeneWise (GeneWise, RRID:SCR\_015054), version 2.4.1  
153 with parameters “- sum - genesf -gff” [19]. For transcriptome-based prediction,  
154 musk gland RNA-seq data were assembled by Trinity (Trinity, RRID:SCR\_013048)  
155 with genome guide and *de novo* mode, respectively. The gene structures were  
156 obtained by PASA pipeline (version 2.0.2) [20]. We used EVM (version 1.1.1) to  
157 integrate the above evidence and obtained a consensus gene set [21]. Apollo  
158 (version 1.11.6) was performed to manually inspect gene structure in scaffolds  
159 of sizes above 1Mb to gain a more accurate gene structure. We consequently  
160 found a total of 24,352 genes predicted to be present in the forest musk deer  
161 genome. We also provided the length of genes in Table S2.

1  
2  
3  
4  
5  
6  
7  
8  
9  
10  
11  
12  
13  
14  
15  
16  
17  
18  
19  
20  
21  
22  
23  
24  
25  
26  
27  
28  
29  
30  
31  
32  
33  
34  
35  
36  
37  
38  
39  
40  
41  
42  
43  
44  
45  
46  
47  
48  
49  
50  
51  
52  
53  
54  
55  
56  
57  
58  
59  
60  
61  
62  
63  
64  
65

162 Functional annotation of forest musk deer genes was undertaken based  
163 on the best match derived from the alignments to proteins annotated in Swiss-  
164 Prot and TrEMBL databases [22]. Functional annotation used BlastP tools with  
165 the same E-value cut-off of 1E-5. We also annotated proteins against the NCBI  
166 non-redundant (nr) protein database. The outputs of blast searching against the  
167 NCBI nr protein database were imported into BLAST2GO (B2G4PIPE v2.5) for  
168 Gene Ontology (GO) [23] term mapping. Term mapping used annotated motifs  
169 and domains using InterProScan (InterProScan, RRID:SCR\_005829),  
170 interproscan-5.18-57.0, [24] by searching against publicly available databases.  
171 To find the best match for each gene, KEGG pathway maps were used by  
172 searching KEGG databases [25] through the KEGG Automatic Annotation Server  
173 (KAAS) using the bi-directional best hit (BBH) method. In total, 23,023 out of  
174 24,352 (94.5%) protein-coding genes were searched within the publicly  
175 available functional databases of TrEMBL, Swiss-Prot, Interpro, GO and KEGG. Of  
176 which, 22,696 (93.20% TrEMBL), 18,771 (77.08% Swiss-Prot), 22,221 (91.12%  
177 Interpro), 15,736 (64.62% GO) and 10,846 (44.54% KEGG) genes showed  
178 significant similarity matches (Figure 1; Table 3). The functional comparisons  
179 with two closely related species (cattle and sheep) for GO classification were  
180 submitted to the Web Gene Ontology Annotation Plot (WEGO) [26] (Figure S2).

181

## 182 5) Repetitive sequences and transposable elements

183 Transposable elements (TEs) and other repeats make up a substantial fraction of  
184 mammalian genomes and contribute to gene or genome evolution [27]. The TE  
185 content, type, copy number, subfamily, and divergence rate were investigated in

186 the forest musk deer genome based on two strategies: the library based strategy  
187 of RepeatMasker (RepeatMasker, RRID:SCR\_012954) [28] and the *de novo* based  
188 strategy of RepeatScout (RepeatScout, RRID:SCR\_014653) [29]. The forest musk  
189 deer genome has large numbers of TEs, comprising 42.05% of the genome (Table  
190 S3), which is similar to those of cattle (46.5%) [27] and goats (42.2%) [30]. The  
191 23 different types of TEs have been grouped for the four different types of TEs,  
192 including DNA transposons, LTR, LINE, and SINE retrotransposons (Figure S3).  
193 The LINEs were the most common repeats in forest musk deer genome; followed  
194 by SINEs > LTR > DNA. We also analyzed the degree of divergence for each type  
195 of TE in the forest musk deer genome. We found there was a recent burst activity  
196 involving LINE transposons and a second, older burst activity of LTR and DNA  
197 transposons (Figure S3).

198 A total of 542,135 microsatellites (simple sequence repeats, SSRs) were  
199 identified by software MSDB [31] in the forest musk deer genome assembly  
200 (Table S4), which accounted for 0.45% of its whole genome length.

201 Mononucleotide SSRs were the most abundant category, accounting for 41.75%  
202 of all of the SSRs; followed by followed by: di- > tri- > tetra- > penta- > hexa  
203 nucleotide SSRs (Table S4).

## 204 205 6) Gene families

206 To estimate species-specific and shared genes in the forest musk deer in  
207 comparison to ten mammal species, we used orthoMCL [32] to define the  
208 orthologous genes. We downloaded the genomes and gene annotations of the ten  
209 additional species (human, horse, dog, cattle, mouse, yak, sheep, Tibetan

1  
2  
3  
4  
5  
6  
7  
8  
9  
10  
11  
12  
13  
14  
15  
16  
17  
18  
19  
20  
21  
22  
23  
24  
25  
26  
27  
28  
29  
30  
31  
32  
33  
34  
35  
36  
37  
38  
39  
40  
41  
42  
43  
44  
45  
46  
47  
48  
49  
50  
51  
52  
53  
54  
55  
56  
57  
58  
59  
60  
61  
62  
63  
64  
65

210 antelope, alpaca, and pig) from Ensembl [33] or NCBI (Table S5). In total, we  
211 identified 18,855 homologous gene families shared by forest musk deer and the  
212 ten additional species, 221 gene families that were specific to forest musk deer,  
213 and 2,003 gene families found in the ten additional species but not in the forest  
214 musk deer (Figure S4). In addition, we found 5,372 one-to-one orthologous  
215 genes within forest musk deer and other ten species, which was used in  
216 phylogenetic analyses. In addition, we detected olfactory receptor (OR) genes in  
217 the forest musk deer genome by orfam (<https://github.com/jianzuoyi/orfam>)  
218 since they formed the largest gene family in mammalian genomes [34]. In total,  
219 we identified 1,236 OR genes, which included 866 intact, 266 pseudogenes, and  
220 104 truncated genes.

221

## 222 7) Phylogenetic analysis

223 We constructed the phylogenetic trees based on Bayesian inference (BI) [35] and  
224 maximum likelihood (ML) [36,37] analyses with the discovered 5,372 one-to-  
225 one orthologous genes (Supplementary notes). All the different methods  
226 generated the same topology and obtained the well-supported phylogenetic tree  
227 (Figure 2). The forest musk deer was within the suborder Ruminantia, order  
228 Artiodactyla, and it appeared as the sister clade of four members of family  
229 Bovidae (sheep, yak, cattle, and Tibetan antelope). Since we do not have high  
230 quality genome sequences for species within family Cervidae, the relationship  
231 between Moschidae, Cervidae, and Bovidae at the genomic level is tentative and  
232 needs further investigation.

233

1  
2  
3  
4  
5  
6  
7  
8  
9  
10  
11  
12  
13  
14  
15  
16  
17  
18  
19  
20  
21  
22  
23  
24  
25  
26  
27  
28  
29  
30  
31  
32  
33  
34  
35  
36  
37  
38  
39  
40  
41  
42  
43  
44  
45  
46  
47  
48  
49  
50  
51  
52  
53  
54  
55  
56  
57  
58  
59  
60  
61  
62  
63  
64  
65

234 **Conclusions**

235 Here, we report the first draft genome assembly of the forest musk deer genome,  
236 a species that is of particular importance to Chinese ecology, biodiversity  
237 conservation, economy, and medicine. The availability of the genome and these  
238 results will be very useful for the conservation and captive breeding of this  
239 endangered and economically important species, and for reconstructing the  
240 evolutionary history of the order Artiodactyla.

241  
242 **Funding**

243 This work was supported by National Key Program of Research and  
244 Development, Ministry of Science and Technology (2016YFC0503200), and  
245 National Natural Science Foundation of China (31702032).

246  
247 **Availability of supporting data**

248 The DNA sequencing data have been deposited into the NCBI Sequence Read  
249 Archive (SRA) under the ID PRJNA317652. Other supporting data, including the  
250 assembled genome, gene annotations and BUSCO results, are available via the  
251 GigaScience repository, GigaDB [38].

252  
253 **Conflicts of interest**

254 The authors declare that they have no competing interests.



1  
2  
3  
4  
5  
6  
7  
8  
9  
10  
11  
12  
13  
14  
15  
16  
17  
18  
19  
20  
21  
22  
23  
24  
25  
26  
27  
28  
29  
30  
31  
32  
33  
34  
35  
36  
37  
38  
39  
40  
41  
42  
43  
44  
45  
46  
47  
48  
49  
50  
51  
52  
53  
54  
55  
56  
57  
58  
59  
60  
61  
62  
63  
64  
65

256 **Author's contributions**

257 Z.F., X.Z., J.L., and B.Y. designed and supervised the project. Z.F., W.L., C.Y., J.J., C.P.,  
258 J.Y., P.B., Y.S., and K.C. performed the bioinformatics analyses. M.P. revised the  
259 manuscript. Z.F. and B.Y. wrote the manuscript.

260

261

262 **Figure Legend**

263 **Figure 1 Functional annotation statistics.** Venn diagram illustrating  
264 distribution of high-score matches of the functional annotation in forest musk  
265 deer genome from five public databases.

266 **Figure 2 Genome wide phylogenetic trees.** We constructed the phylogenetic  
267 trees based on Bayesian inference and maximum likelihood analyses with 5,372  
268 one-to-one orthologous genes between the forest musk deer and ten other  
269 species.

270 **Figure S1 K-mer (k=17) distributions in forest musk deer genome.**

271 **Figure S2 GO comparative analysis and functional classification between**  
272 **forest musk deer, sheep and cattle.**

273 **Figure S3 Distribution of divergence of each type of TEs in forest musk deer**  
274 **genome.** The divergence rate was calculated between the identified TE elements  
275 in the genome and the consensus sequence in the TE library used. SINEs: Short  
276 interspersed elements. LINEs: Long interspersed elements. LTR: Long terminal  
277 repeat retrotransposon.

1  
2  
3  
4  
5  
6  
7  
8  
9  
10  
11  
12  
13  
14  
15  
16  
17  
18  
19  
20  
21  
22  
23  
24  
25  
26  
27  
28  
29  
30  
31  
32  
33  
34  
35  
36  
37  
38  
39  
40  
41  
42  
43  
44  
45  
46  
47  
48  
49  
50  
51  
52  
53  
54  
55  
56  
57  
58  
59  
60  
61  
62  
63  
64  
65

278 **Figure S4 Protein orthology comparison between different genomes.** There  
279 were forest musk deer (*Moschus bweezovskii*), cattle (*Bos taurus*), yak (*Bos*  
280 *grunniens*), sheep (*Ovis aries*), Tibetan antelope (*Pantholops hodgsonii*), alpaca  
281 (*Vicugna pacos*), and pig (*Sus scrofa*), which representing Artiodactyla; human  
282 (*Homo sapiens*, Primates), horse (*Equus caballus*, Perissodactyla), and dog (*Canis*  
283 *lupus familiaris*, Carnivora), mouse (*Mus musculus*, Rodentia). For each animal,  
284 proteins were represented by bars and were classified based on orthoMCL  
285 analysis. Single\_copy (green) included the common orthologs with the same  
286 number of copies in different species; Multi\_copy (red) included the common  
287 orthologs with different copy numbers in different species; Unique (magenta)  
288 included the orthologs that were only in one species; Unclustered genes (yellow)  
289 included the genes that could not be clustered into known gene families; Other  
290 (blue) included the genes that could be clustered into known gene families, but  
291 were not belonged to Single\_copy, Multi\_copy or Unique.

301

302 **References**

- 303 1. Cobert GB, Hill JE. The mammals of the Indomalaysia region: a systematic  
304 review. London (UK): Natural History Museum Publications Oxford  
305 University Press. 1992.
- 306 2. Wu J, Wang W. The Musk Deer of China. The China Forestry Publishing House,  
307 Beijing. 2006.
- 308 3. Sheng H, Liu Z. The Musk Deer in China. The Shanghai Scientific & Technical  
309 Publishers, Shanghai. 2007.
- 310 4. IUCN. The IUCN Red List of Threatened Species. 2017  
311 (<http://www.iucnredlist.org/>)
- 312 5. Green MJB. The distribution, status and conservation of the Himalayan musk  
313 deer (*Moschus chrysogaster*). *Biol. Conserv.* 1986;35, 347–75.
- 314 6. Sheng H. Genus *Moschus* in China. In: Wang, S. (Ed.), *China Red Data Book of*  
315 *Endangered Animals*. Science Press, Beijing. 1998.
- 316 7. Zhao K, Liu Y, Zhang X, et al. Detection and characterization of antibiotic-  
317 resistance genes in *Arcanobacterium pyogenes* strains from abscesses of  
318 forest musk deer. *J Med Microbiol.* 2011;60:1820-6.
- 319 8. Yang Q, Meng X, Xia L, Feng Z. Conservation status and causes of decline of  
320 musk deer (*Moschus spp.*) in China. *Biol. Conserv.* 2003;109, 333–342.
- 321 9. Peng H, Liu S, Zou F, Zeng B, Yue B. Genetic diversity of captive forest musk  
322 deer (*Moschus berezovskii*) inferred from the mitochondrial DNA control  
323 region. *Anim Genet.* 2009;40(1):65-72.

- 1  
2  
3  
4  
5  
6  
7  
8  
9  
10  
11  
12  
13  
14  
15  
16  
17  
18  
19  
20  
21  
22  
23  
24  
25  
26  
27  
28  
29  
30  
31  
32  
33  
34  
35  
36  
37  
38  
39  
40  
41  
42  
43  
44  
45  
46  
47  
48  
49  
50  
51  
52  
53  
54  
55  
56  
57  
58  
59  
60  
61  
62  
63  
64  
65
- 324 10. Huang J, Li Y, Li P, et al. Genetic quality of the Miyaluo captive forest musk  
325 deer (*Moschus berezovskii*) population as assessed by microsatellite loci.  
326 *Biochemical Systematics & Ecology*, 2013;47(8):25-30.
- 327 11. Lu X, Qiao J, Wu X, Su L. A review of mainly affected on musk-deer diseases:  
328 purulent, respiratory system and parasitic diseases. *J Economic Anim*  
329 2009, 13, 104–107.
- 330 12. Xu Z, Jie H, Chen B, et al. Illumina-based de novo transcriptome sequencing  
331 and analysis of Chinese forest musk deer. *J Genet*. 2017;96(6):1033-1040.
- 332 13. Sun X, Cai R, Jin X, et al. Blood transcriptomics of captive forest musk deer  
333 (*Moschus berezovskii*) and possible associations with the immune  
334 response to abscesses. *Sci Rep*. 2018;8(1):599.
- 335 14. Luo R, Liu B, Xie Y, et al. SOAPdenovo2: an empirically improved memory-  
336 efficient short-read de novo assembler. *Gigascience* 2012;1(1):18.
- 337 15. Boetzer M, Henkel CV, Jansen HJ, Butler D, Pirovano W. Scaffolding pre-  
338 assembled contigs using SSPACE. *Bioinformatics*. 2011;27(4):578-9.
- 339 16. Langmead B, Salzberg SL. Fast gapped-read alignment with Bowtie 2. *Nat*  
340 *Methods*. 2012;9(4):357-9.
- 341 17. Stanke M, Diekhans M, Baertsch R, Haussler D. Using native and syntenically  
342 mapped cDNA alignments to improve de novo gene finding.  
343 *Bioinformatics*. 2008;24(5):637-44.
- 344 18. Yu XJ, Zheng HK, Wang J, Wang W, Su B. Detecting lineage-specific adaptive  
345 evolution of brain-expressed genes in human using rhesus macaque as  
346 outgroup. *Genomics*. 2006;88(6):745-751.

- 1  
2  
3  
4  
5  
6  
7  
8  
9  
10  
11  
12  
13  
14  
15  
16  
17  
18  
19  
20  
21  
22  
23  
24  
25  
26  
27  
28  
29  
30  
31  
32  
33  
34  
35  
36  
37  
38  
39  
40  
41  
42  
43  
44  
45  
46  
47  
48  
49  
50  
51  
52  
53  
54  
55  
56  
57  
58  
59  
60  
61  
62  
63  
64  
65
- 347 19. Birney E, Clamp M, Durbin R. GeneWise and Genomewise. *Genome Res.*  
348 2004;14(5):988-95.
- 349 20. Haas BJ, Delcher AL, Mount SM, et al. Improving the Arabidopsis genome  
350 annotation using maximal transcript alignment assemblies. *Nucleic Acids*  
351 *Res.* 2003;31(19):5654-66.
- 352 21. Haas BJ, Salzberg SL, Zhu W, Pertea M, Allen JE, Orvis J, White O, Buell CR,  
353 Wortman JR. Automated eukaryotic gene structure annotation using  
354 EVIDENCEModeler and the Program to Assemble Spliced Alignments.  
355 *Genome Biol.* 2008;9(1):R7.
- 356 22. Boeckmann B, Bairoch A, Apweiler R, et al. The SWISS-PROT protein  
357 knowledgebase and its supplement TrEMBL in 2003. *Nucleic Acids Res.*  
358 2003;31(1):365-70.
- 359 23. Gene Ontology Consortium. Gene Ontology annotations and resources.  
360 *Nucleic Acids Res.* 2013;41(Database issue):D530-5.
- 361 24. Hunter S, Apweiler R, Attwood TK, et al. InterPro: the integrative protein  
362 signature database. *Nucleic Acids Res.* 2009;37(Database issue):D211-5.
- 363 25. Kanehisa M, Goto S. KEGG: kyoto encyclopedia of genes and genomes. *Nucleic*  
364 *Acids Res.* 2000;28(1):27-30.
- 365 26. Ye J, Fang L, Zheng H, et al. WEGO: a web tool for plotting GO annotations.  
366 *Nucleic Acids Res.* 2006;34(Web Server issue):W293-7.
- 367 27. Adelson DL, Raison JM, Edgar RC. Characterization and distribution of  
368 retrotransposons and simple sequence repeats in the bovine genome.  
369 *Proc Natl Acad Sci U S A.* 2009;106(31):12855-60.

- 1  
2  
3  
4  
5  
6  
7  
8  
9  
10  
11  
12  
13  
14  
15  
16  
17  
18  
19  
20  
21  
22  
23  
24  
25  
26  
27  
28  
29  
30  
31  
32  
33  
34  
35  
36  
37  
38  
39  
40  
41  
42  
43  
44  
45  
46  
47  
48  
49  
50  
51  
52  
53  
54  
55  
56  
57  
58  
59  
60  
61  
62  
63  
64  
65
- 370 28. Smit AFA, Hubley R, Green P. 2016. RepeatMasker website and  
371 server[CP/OL]. (2016-9-12)[2016-10-15].  
372 <http://www.repeatmasker.org/>.
- 373 29. Price AL, Jones NC, Pevzner PA. De novo identification of repeat families in  
374 large genomes. *Bioinformatics*. 2005;21 Suppl 1:i351-8.
- 375 30. Dong Y, Xie M, Jiang Y, et al. Sequencing and automated whole-genome  
376 optical mapping of the genome of a domestic goat (*Capra hircus*). *Nat*  
377 *Biotechnol*. 2013;31(2):135-41.
- 378 31. Du L, Li Y, Zhang X, Yue B. MSDB: a user-friendly program for reporting  
379 distribution and building databases of microsatellites from genome  
380 sequences. *J Hered*. 2013;104(1):154-7.
- 381 32. Li L, Stoeckert CJ Jr, Roos DS. OrthoMCL: identification of ortholog groups for  
382 eukaryotic genomes. *Genome Res*. 2003;13(9):2178-89.
- 383 33. Yates A, Akanni W, Amode MR et al. Ensembl 2016. *Nucleic Acids Res*.  
384 2016;44(D1):D710-16.
- 385 34. Firestein S. How the olfactory system makes sense of scents. *Nature*.  
386 2001;413(6852):211-8.
- 387 35. Ronquist F, Huelsenbeck JP. MrBayes 3: Bayesian phylogenetic inference  
388 under mixed models. *Bioinformatics*. 2003;19(12):1572-4.
- 389 36. Guindon S, Dufayard JF, Lefort V, et al. New algorithms and methods to  
390 estimate maximum-likelihood phylogenies: assessing the performance of  
391 PhyML 3.0. *Syst Biol*. 2010;59(3):307-21.

1  
2  
3  
4  
5  
6  
7  
8  
9  
10  
11  
12  
13  
14  
15  
16  
17  
18  
19  
20  
21  
22  
23  
24  
25  
26  
27  
28  
29  
30  
31  
32  
33  
34  
35  
36  
37  
38  
39  
40  
41  
42  
43  
44  
45  
46  
47  
48  
49  
50  
51  
52  
53  
54  
55  
56  
57  
58  
59  
60  
61  
62  
63  
64  
65

392 37. Stamatakis A, Hoover P, Rougemont J. A rapid bootstrap algorithm for the  
393 RAxML Web servers. *Syst Biol.* 2008;57(5):758-71.  
394 38. Fan Z, Li W, Jin J, Cui K, Yan C, Peng C, et al Supporting data for "The draft  
395 genome sequence of forest musk deer (*Moschus berezovskii*)"  
396 *GigaScience* Database 2018. <http://dx.doi.org/10.5524/100411>

Table 1 Genome sequencing information.

| Insert size (bp) | Read length ( bp) | Raw data         |                      | Clean data       |                      |
|------------------|-------------------|------------------|----------------------|------------------|----------------------|
|                  |                   | Total bases (Gb) | Sequencing depth (x) | Total bases (Gb) | Sequencing depth (x) |
| 230              | 125               | 135.76           | 46.02                | 125.96           | 42.70                |
| 500              | 125               | 102.51           | 34.75                | 88.52            | 30.01                |
| 2,000            | 125               | 59.0             | 20.00                | 50.16            | 17.00                |
| 5,000            | 125               | 51.57            | 17.48                | 46.39            | 15.73                |
| 10,000           | 125               | 28.16            | 9.55                 | 24.67            | 8.36                 |
| 15,000           | 125               | 30.34            | 10.28                | 28.14            | 9.54                 |
| Total            |                   | 407.34           | 138.08               | 363.84           | 123.34               |

Note: Genome size is 2.95Gb.



Table 2 Statistics of the final assembly of forest musk deer genome.

| Genome assembly       | Numbers |
|-----------------------|---------|
| Contig N50 (Kb)       | 22.6    |
| Scaffold N50 (Mb)     | 2.85    |
| Longest scaffold (Mb) | 18.69   |
| Scaffold number       | 79,206  |
| GC content            | 40%     |
| Total length (Gb)     | 2.72    |

Table 3 Functional annotation statistics of the forest musk deer genome by various methods.

|              | Database          | Number | Percent (%) |
|--------------|-------------------|--------|-------------|
| Total        |                   | 24,352 | 100.00      |
|              | Swissprot         | 18,771 | 77.08       |
|              | TrEMBL            | 22,696 | 93.20       |
| Annotated    | KEGG              | 10,846 | 44.54       |
|              | Interpro          | 22,221 | 91.12       |
|              | GO (blast2go)     | 15,736 | 64.62       |
|              | GO (Interproscan) | 14,815 | 60.84       |
| Un-annotated |                   | 1,329  | 5.77        |

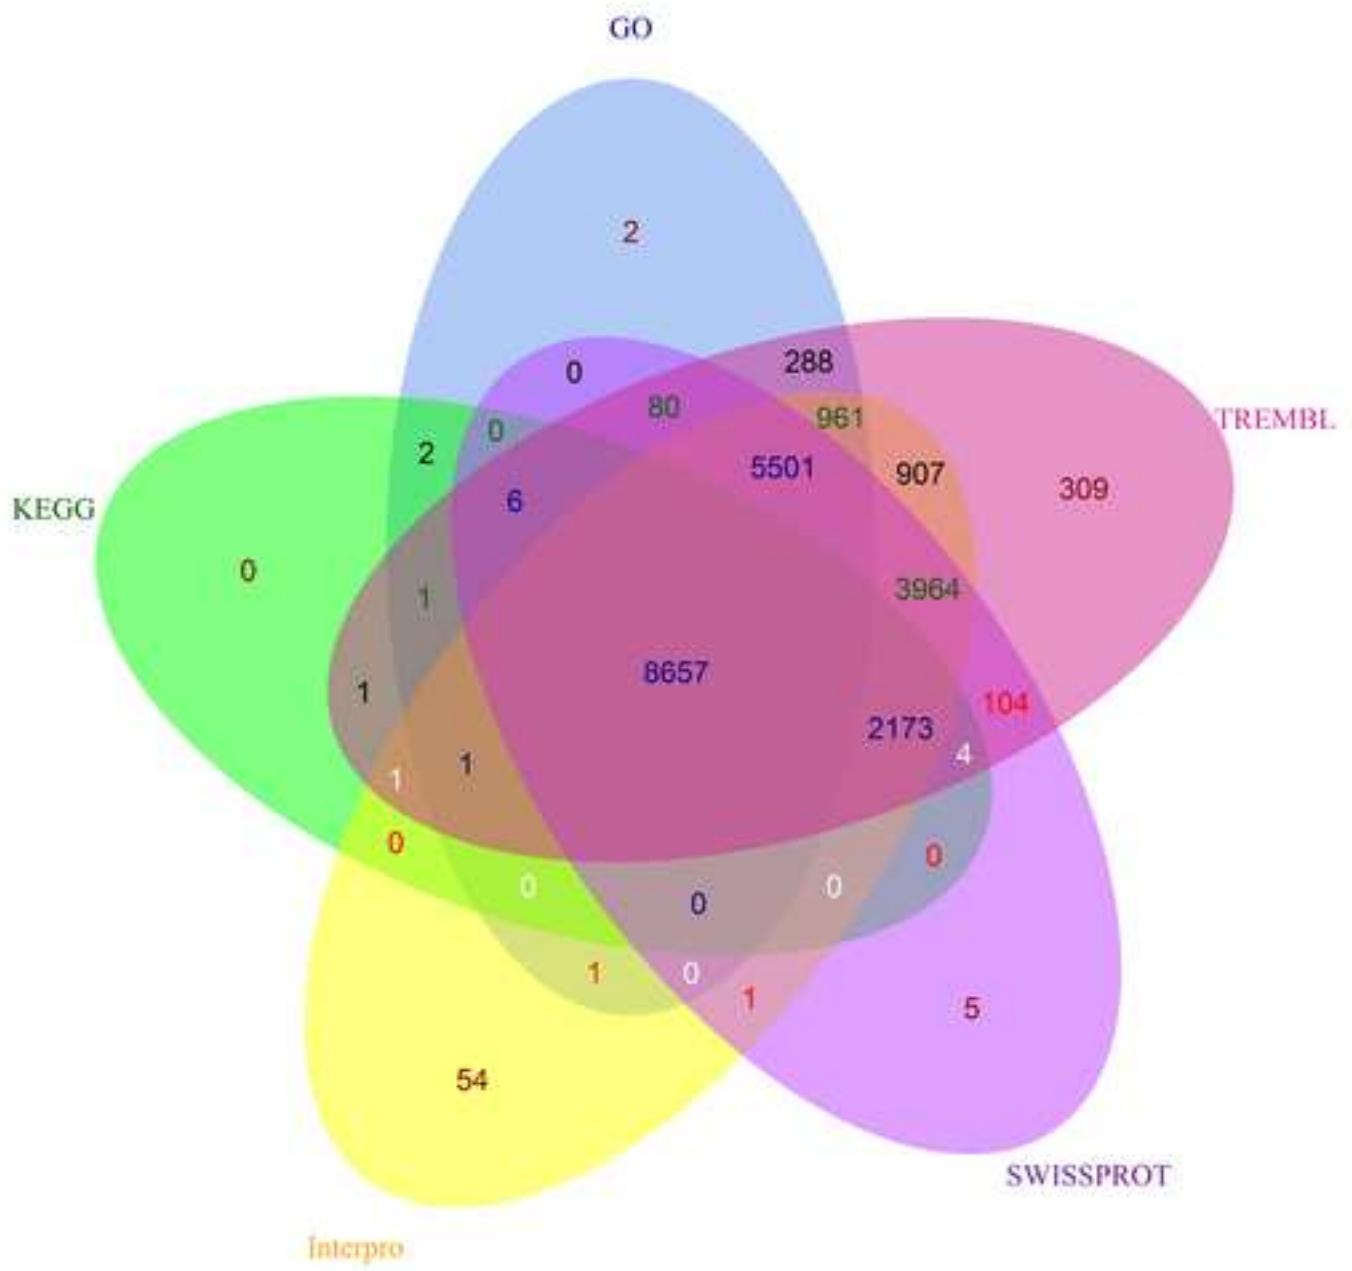

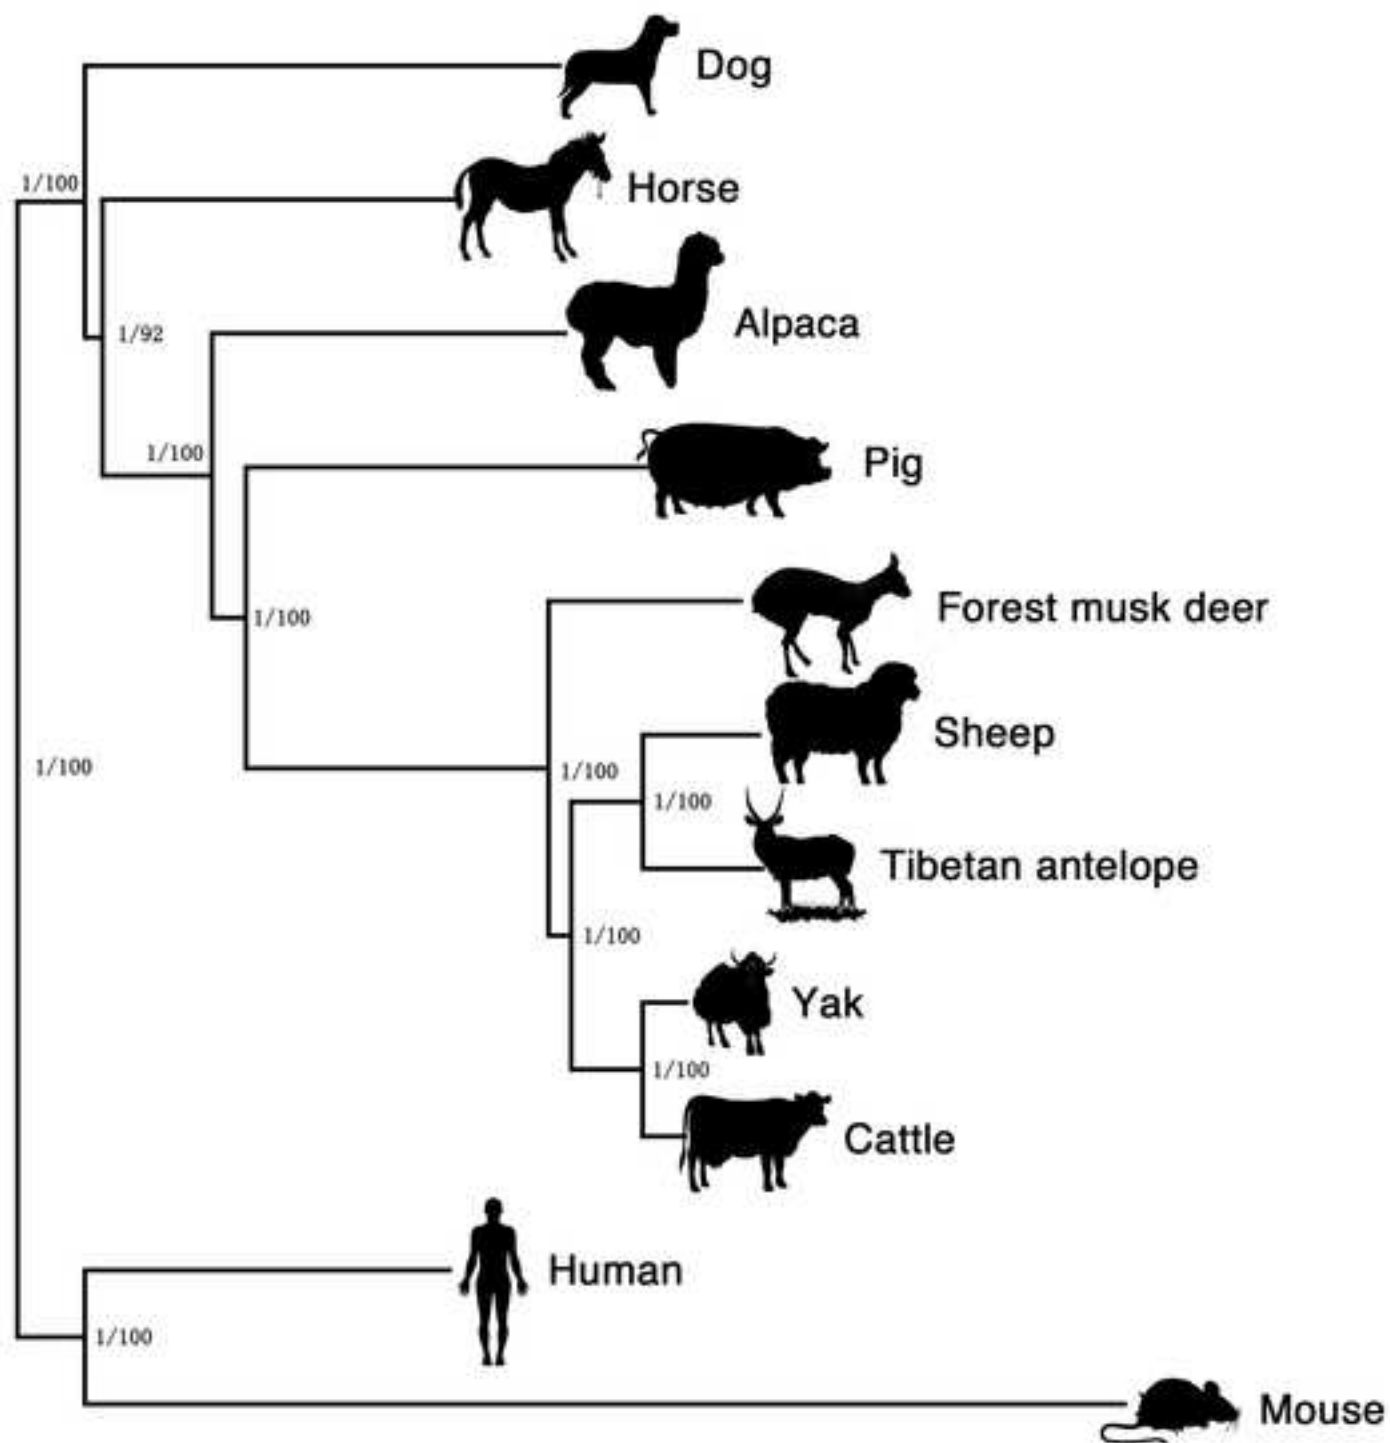



Click here to access/download  
**Supplementary Material**  
Figure S1\_kmer.tif





Click here to access/download  
**Supplementary Material**  
Figure S2\_wego.pdf



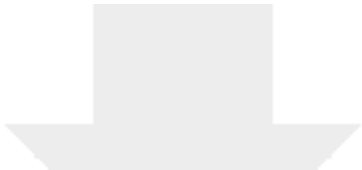

Click here to access/download  
**Supplementary Material**  
Figure S3\_TE\_type.tif



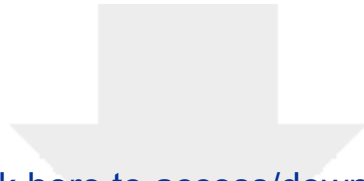

Click here to access/download  
**Supplementary Material**  
Figure S4\_OrthologousGene.tif

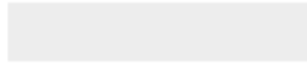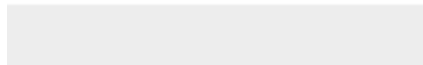





Click here to access/download  
**Supplementary Material**  
Table S1\_BUSCO.docx





Click here to access/download  
**Supplementary Material**  
Table S2\_new.docx





Click here to access/download  
**Supplementary Material**  
Table S3\_repeat.docx



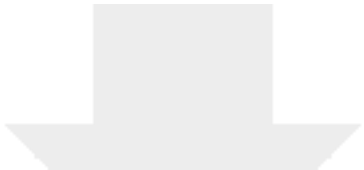

Click here to access/download  
**Supplementary Material**  
Table S4\_SSR.docx



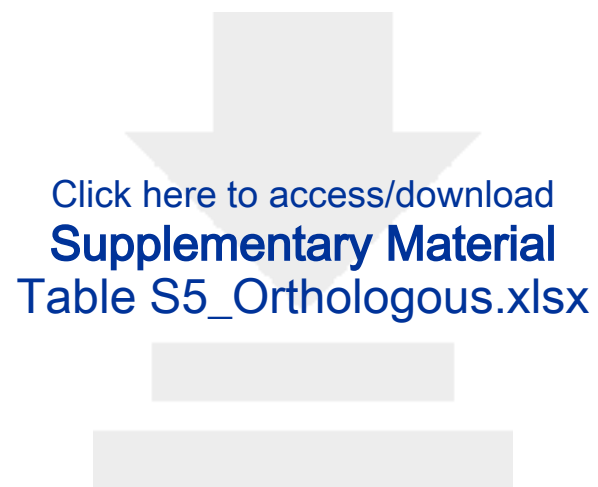

Click here to access/download  
**Supplementary Material**  
Table S5\_Orthologous.xlsx

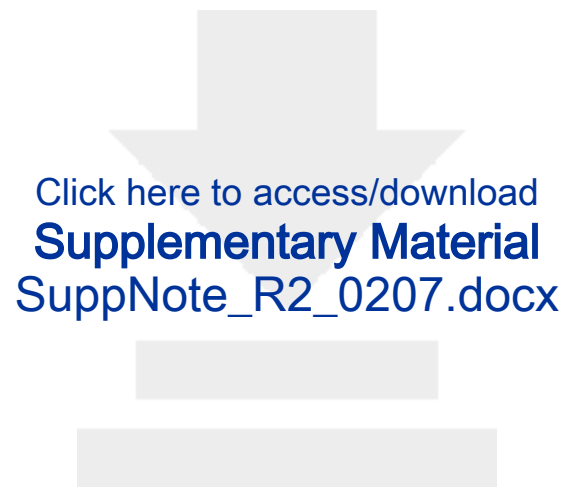

Click here to access/download  
**Supplementary Material**  
SuppNote\_R2\_0207.docx
